# Supplementary material
Source: PubMed Central journal article supplement (PMC2590852)
Supplement: NIHMS3020-supplement-supp_tables.pdf [file NIHMS3020-supplement-supp_tables.pdf]

**Y-specific primers in regions of high XY-homology**

| <b>STS name</b> | <b>Primer A</b>        | <b>Primer B</b>         | <b>Size/bp</b> | <b>Y-specific<br/>Ta/°C</b> |
|-----------------|------------------------|-------------------------|----------------|-----------------------------|
| <b>sY870Y</b>   | ATCTTCTCTGATGTGTTACC   | CACAATGTAAGAACTATATAAAC | 303            | 57                          |
| <b>Y690K</b>    | CCCAATCAAATGTAGCCAG    | GCAATGGACACAGTGAGTC     | 303            | 64                          |
| <b>TGIF2LY</b>  | GACCAATTTGTCTTTGTTGCG  | AACAGGTTTACCACAGTACAC   | 516            | 63                          |
| <b>sY872Y</b>   | GGAAAGTGGTGGGTGTTTTTC  | CTGTTTAGCATAACATACCCAG  | 415            | 60                          |
| <b>sY874Y</b>   | TTGCTGAACTGATAGGTAAC   | TCAGCTACACCATTAATAAC    | 276            | 61                          |
| <b>sY29Y</b>    | AGCACACTAACATACACATG   | CTTGCAGCATTCATAACTTC    | 234            | 58                          |
| <b>sY42Y</b>    | TGCATAGACCAAAAATTGAATC | TGTTGAGGTGGTGAATCAG     | 374            | 58                          |
| <b>sY50Y</b>    | ACAAGAATAGAAAAATCACCG  | GTATACTGAAAGTCATCAAAAAG | 334            | 55                          |
| <b>sY73Y</b>    | CAGCTGCCTTGATAGAATGT   | AGCCCAAATTAGCTAGGTGGC   | 326            | 59                          |

Jobling et al. Supplementary Table 2

| sample  | 19 | 385   | 388 | 390 | 391 | 392 | 393 | 425  | 426  | 434 | 435 | 436 | 437 | 438 | 439 | 447  | 448 | 460 | 461 | 462 | 389I | 389II | H4 | YCAII | hg     |
|---------|----|-------|-----|-----|-----|-----|-----|------|------|-----|-----|-----|-----|-----|-----|------|-----|-----|-----|-----|------|-------|----|-------|--------|
| N5      | 13 | 11,18 | 12  | 25  | 11  | 12  | 13  | 12   | 11   | 11  | 11  | 12  | 14  | 10  | 13  | 26.2 | 21  | 10  | 12  | 12  | 12   | 26    | 12 | 16,19 | D      |
| 710/01  | 16 | 13,14 | 13  | 22  | 11  | 11  | 14  | 12   | 11   | 10  | 11  | 12  | 16  | 10  | 11  | 23   | 21  | 11  | 12  | 12  | 14   | 30    | 12 | 18,19 | G      |
| N9      | 14 | 15,17 | 12  | 24  | 10  | 11  | 14  | 12   | 11   | 12  | 11  | 12  | 14  | 10  | 11  | 23   | 19  | 12  | 12  | 12  | 13   | 31    | 12 | 17,19 | H(xH2) |
| MD54    | 14 | 15,17 | 12  | 24  | 10  | 11  | 14  | 12   | 11   | 12  | 11  | 12  | 14  | 10  | 11  | 23   | 19  | 11  | 12  | 12  | 13   | 31    | 12 | 17,19 | H(xH2) |
| HE4     | 14 | 14,18 | 12  | 24  | 10  | 11  | 14  | 12   | 11   | 12  | 11  | 12  | 14  | 10  | 11  | 23   | 19  | 11  | 12  | 12  | 13   | 31    | 12 | 17,19 | H(xH2) |
| CM2     | 15 | 15,15 | 13  | 23  | 10  | 12  | 13  | 12   | 11   | 11  | 11  | 12  | 14  | 10  | 11  | 25   | 20  | 11  | 12  | 12  | 13   | 31    | 11 | 17,19 | I      |
| A532    | 15 | 13,16 | 15  | 25  | 10  | 11  | 12  | 12   | 11   | 11  | 11  | 12  | 15  | 9   | 13  | 24   | 19  | 11  | 9   | 11  | 12   | 28    | 11 | 17,18 | J2e1*  |
| WA06    | 14 | 13,13 | 15  | 24  | 11  | 11  | 12  | 12   | 11   | 11  | 11  | 12  | 15  | 7   | 11  | 27   | 18  | 11  | 9   | 11  | 12   | 29    | 11 | 17,18 | J2e1*  |
| WA23    | 15 | 13,16 | 15  | 24  | 9   | 11  | 12  | 12   | 11   | 11  | 11  | 12  | 15  | 9   | 12  | 25   | 19  | 11  | 9   | 11  | 12   | 28    | 11 | 17,18 | J2e1*  |
| N1      | 15 | 13,17 | 15  | 25  | 10  | 11  | 12  | null | 11   | 11  | 11  | 12  | 15  | 9   | 11  | 26   | 18  | 10  | 9   | 11  | 12   | 29    | 12 | 17,18 | J2e1*  |
| N3      | 15 | 14,17 | 15  | 25  | 11  | 11  | 12  | 12   | 11   | 11  | 11  | 12  | 14  | 9   | 12  | 26   | 18  | 12  | 9   | 12  | 12   | 28    | 11 | 17,18 | J2e1*  |
| N7      | 15 | 13,16 | 14  | 23  | 10  | 11  | 12  | 12   | 11   | 11  | 11  | 12  | 15  | 9   | 12  | 23   | 19  | 11  | 9   | 11  | 12   | 28    | 11 | 17,18 | J2e1*  |
| N8      | 15 | 14,17 | 15  | 24  | 10  | 11  | 12  | 12   | 11   | 11  | 11  | 12  | 15  | 9   | 12  | 25   | 19  | 10  | 9   | 12  | 11   | 28    | 11 | 17,18 | J2e1*  |
| N10     | 15 | 14,17 | 15  | 23  | 11  | 11  | 12  | 12   | 11   | 11  | 11  | 12  | 15  | 9   | 12  | 26   | 18  | 11  | 9   | 11  | 12   | 28    | 11 | 17,18 | J2e1*  |
| N11     | 16 | 13,17 | 15  | 25  | 10  | 11  | 12  | 12   | 11   | 11  | 11  | 12  | 15  | 9   | 11  | 26   | 18  | 11  | 9   | 11  | 12   | 28    | 11 | 17,18 | J2e1*  |
| N12     | 15 | 13,18 | 17  | 24  | 10  | 11  | 12  | 12   | 11   | 11  | 11  | 12  | 15  | 9   | 12  | 26   | 17  | 11  | 9   | 11  | 12   | 28    | 11 | 17,18 | J2e1*  |
| N15     | 16 | 13,17 | 15  | 24  | 10  | 11  | 12  | 12   | 11   | 11  | 11  | 12  | 15  | 9   | 12  | 26   | 21  | 11  | 9   | 11  | 12   | 28    | 11 | 17,18 | J2e1*  |
| N2      | 16 | 13,17 | 15  | 24  | 10  | 11  | 12  | 12   | 11   | 11  | 11  | 12  | 15  | 9   | 13  | 25   | 18  | 10  | 9   | 11  | 12   | 28    | 11 | 17,18 | J2e1*  |
| N4      | 17 | 14,17 | 14  | 23  | 10  | 11  | 12  | 12   | 11   | 12  | 11  | 12  | 15  | 9   | 13  | 24   | 19  | 11  | 9   | 11  | 12   | 28    | 11 | 17,18 | J2e1*  |
| VIC-E   | 15 | 14,17 | 15  | 24  | 11  | 11  | 12  | 12   | 11   | 11  | 11  | 12  | 15  | 9   | 12  | 26   | 18  | 10  | 9   | 11  | 12   | 28    | 11 | 17,18 | J2e1*  |
| N13     | 17 | 13,18 | 16  | 25  | 10  | 12  | 12  | 12   | 11   | 11  | 11  | 12  | 15  | 9   | 12  | 24   | 18  | 11  | 9   | 11  | 12   | 29    | 11 | 17,18 | J2e1*  |
| N14     | 15 | 13,17 | 15  | 24  | 10  | 11  | 12  | 12   | 11   | 11  | 11  | 12  | 14  | 9   | 13  | 26   | 18  | 11  | 9   | 11  | 12   | 28    | 10 | 17,18 | J2e1*  |
| MD91    | 15 | 14,18 | 16  | 24  | 10  | 11  | 12  | 12   | 11   | 11  | 11  | 12  | 15  | 9   | 12  | 24   | 19  | 12  | 9   | 12  | 13   | 30    | 11 | 17,18 | J2e1*  |
| 37114   | 15 | 13,17 | 15  | 24  | 10  | 11  | 12  | 12   | 11   | 11  | 11  | 12  | 15  | 9   | 12  | 26   | 19  | 11  | 9   | 11  | 12   | 28    | 11 | 17,18 | J2e1*  |
| H95     | 15 | 12,16 | 15  | 23  | 10  | 11  | 12  | 12   | 11   | 11  | 11  | 12  | 15  | 9   | 12  | 26   | 19  | 11  | 9   | 12  | 12   | 28    | 11 | 17,18 | J2e1*  |
| H108    | 15 | 12,16 | 15  | 23  | 10  | 11  | 12  | 12   | 11   | 11  | 11  | 12  | 15  | 9   | 13  | 26   | 19  | 11  | 9   | 12  | 12   | 28    | 11 | 17,18 | J2e1*  |
| H620    | 16 | 13,17 | 16  | 23  | 10  | 11  | 12  | 12   | 11   | 11  | 11  | 12  | 14  | 9   | 12  | 26   | 18  | 10  | 9   | 11  | 12   | 28    | 11 | 17,18 | J2e1*  |
| H857    | 15 | 13,17 | 15  | 25  | 10  | 11  | 12  | 12   | 11   | 11  | 11  | 12  | 15  | 9   | 12  | 26   | 19  | 11  | 9   | 11  | 12   | 28    | 11 | 17,18 | J2e1*  |
| H859    | 15 | 13,18 | 15  | 25  | 10  | 11  | 12  | 12   | 11   | 11  | 11  | 12  | 15  | 9   | 12  | 26   | 19  | 11  | 9   | 11  | 12   | 28    | 12 | 17,18 | J2e1*  |
| H867    | 15 | 13,18 | 15  | 26  | 10  | 11  | 12  | 12   | 11   | 11  | 11  | 12  | 15  | 9   | 12  | 26   | 19  | 11  | 9   | 11  | 12   | 28    | 11 | 17,18 | J2e1*  |
| H869    | 15 | 13,18 | 15  | 25  | 10  | 11  | 12  | 12   | 11   | 11  | 11  | 12  | 15  | 9   | 12  | 26   | 19  | 11  | 9   | 11  | 12   | 28    | 12 | 17,18 | J2e1*  |
| H91     | 16 | 12,16 | 15  | 23  | 10  | 11  | 12  | 12   | 11   | 11  | 11  | 12  | 15  | 9   | 13  | 26   | 19  | 11  | 9   | 12  | 12   | 28    | 11 | 17,18 | J2e1*  |
| m632    | 15 | 18,18 | 15  | 24  | 10  | 11  | 13  | 12   | 11   | 11  | 11  | 12  | 15  | 9   | 12  | 27   | 19  | 11  | 9   | 11  | 12   | 28    | 11 | 17,18 | J2e1*  |
| m640    | 15 | 13,17 | 15  | 22  | 10  | 11  | 12  | 12   | 11   | 11  | 11  | 12  | 15  | 9   | 13  | 25   | 19  | 11  | 9   | 11  | 12   | 28    | 11 | 17,18 | J2e1*  |
| WA22    | 14 | 11,14 | 12  | 24  | 10  | 13  | 13  | 12   | 12   | 11  | 11  | 12  | 15  | 12  | 12  | 26   | 19  | 10  | 12  | 11  | 13   | 29    | 12 | 17,17 | R1b3   |
| WA25    | 14 | 11,14 | 12  | 24  | 10  | 13  | 13  | 12   | 12   | 11  | 11  | 12  | 15  | 12  | 12  | 26   | 19  | 10  | 12  | 11  | 13   | 29    | 12 | 17,17 | R1b3   |
| WA39    | 14 | 11,14 | 12  | 24  | 10  | 13  | 13  | 12   | 12   | 11  | 11  | 12  | 15  | 12  | 12  | 26   | 19  | 10  | 12  | 11  | 13   | 29    | 12 | 17,17 | R1b3   |
| WA49    | 14 | 11,14 | 12  | 24  | 10  | 13  | 13  | 12   | 12   | 11  | 11  | 12  | 15  | 12  | 12  | 26   | 19  | 10  | 12  | 11  | 13   | 29    | 12 | 17,17 | R1b3   |
| IP517   | 17 | 12,16 | 13  | 25  | 10  | 11  | 13  | 12   | 11   | 11  | 11  | 12  | 15  | 10  | 12  | 25   | 18  | 10  | 12  | 12  | 12   | 29    | 10 | 16,17 | I      |
| VIC-C   | 15 | 14,18 | 15  | 24  | 11  | 11  | 12  | 12   | 11   | 11  | 11  | 12  | 15  | 9   | 12  | 25   | 18  | 11  | 9   | 11  | 12   | 28    | 12 | 17,17 | J2e1*  |
| H401    | 15 | 13,16 | 16  | 24  | 11  | 11  | 12  | 12   | 11   | 11  | 11  | 12  | 15  | 7   | 12  | 27   | 18  | 11  | 9   | 11  | 12   | 28    | 11 | 17,18 | J2e1*  |
| VIC-B   | 13 | 11,14 | 12  | 24  | 10  | 13  | 13  | 12   | 11   | 11  | 11  | 12  | 15  | 12  | 12  | 25   | 19  | 11  | 12  | 11  | 13   | 29    | 10 | 17,21 | R1b3   |
| 121/04  | 13 | 12,14 | 12  | 24  | 11  | 13  | 13  | 12   | null | 11  | 11  | 12  | 15  | 12  | 12  | 25   | 19  | 11  | 13  | 11  | 13   | 29    | 8  | 17,21 | R1b3   |
| CM1     | 14 | 11,14 | 12  | 23  | 11  | 13  | 13  | 12   | 12   | 11  | 11  | 12  | 15  | 12  | 12  | 24   | 19  | 11  | 12  | 11  | 13   | 29    | 12 | 17,21 | R1b3   |
| HGDP644 | 14 | 13,17 | 17  | 22  | 11  | 11  | 12  | 12   | 11   | 11  | 11  | 12  | 14  | 10  | 11  | 27   | 20  | 11  | 11  | 11  | 13   | 29    | 11 | 20,20 | J(xJ2) |
